# Supplementary material for: Rational Design of Benzylidenehydrazinyl-Substituted Thiazole Derivatives as Potent Inhibitors of Human Dihydroorotate Dehydrogenase with in Vivo Anti-arthritic Activity
Source: PubMed Central journal article supplement (PMC4595849; doi:10.1038/srep14836), 2015-10-07
Supplement: srep14836-s1.pdf [file srep14836-s1.pdf]

## Supporting Information

### **Rational Design of Benzylidenehydrazinyl-Substituted Thiazole Derivatives as Potent Inhibitors of Human Dihydroorotate Dehydrogenase with *in vivo* Anti-arthritic Activity**

Shiliang Li<sup>1, †</sup>, Guoqin Luan<sup>1, †</sup>, Xiaoli Ren<sup>1, †</sup>, Wenlin Song<sup>1</sup>, Liuxin Xu<sup>1</sup>, Minghao Xu<sup>1</sup>, Junsheng Zhu<sup>1</sup>, Dong Dong<sup>1</sup>, Yanyan Diao<sup>1</sup>, Xiaofeng Liu<sup>1</sup>, Lili Zhu<sup>1</sup>, Rui Wang<sup>1</sup>, Zhenjiang Zhao<sup>1, \*</sup>, Yufang Xu<sup>1, \*</sup>, Honglin Li<sup>1, \*</sup>

<sup>1</sup> *State Key Laboratory of Bioreactor Engineering, Shanghai Key Laboratory of New Drug Design, School of Pharmacy, East China University of Science and Technology, Shanghai 200237, China.*

<sup>†</sup> Authors contributed equally to this work

\*To whom correspondence should be addressed. Email: [zhjzhao@ecust.edu.cn](mailto:zhjzhao@ecust.edu.cn),  
[yfxu@ecust.edu.cn](mailto:yfxu@ecust.edu.cn), [hlli@ecust.edu.cn](mailto:hlli@ecust.edu.cn)

## Content

|                                                                                              |    |
|----------------------------------------------------------------------------------------------|----|
| <b>Table S1.</b> HPLC analysis data of the commercially obtained compounds <b>7-14</b> ..... | S3 |
| <b>Table S2.</b> Information about the 35 crystal structures of <i>h</i> DHODH. ....         | S5 |
| <b>Schemes</b> .....                                                                         | S6 |
| <b>Scheme S1.</b> Synthesis of the derivatives <b>15-18, 20-21</b> .....                     | S6 |
| <b>Scheme S2.</b> Synthesis of the derivatives <b>19, 24-32</b> .....                        | S7 |
| <b>Scheme S3.</b> Synthesis of the intermediates <b>24V-25V</b> .....                        | S8 |
| <b>Scheme S4.</b> Synthesis of the derivatives <b>22-23</b> .....                            | S9 |

**Table S1.** HPLC analysis data of the commercially obtained compounds **7-14**. The purity of the 8 bought compounds in the paper was determined by HPLC equipped with a Diamonsil-C18 column (250×4.6 mm, 5 μm particle size) and a UV/VIS detector setting of  $\lambda = 254$  nm. All compounds were eluted with the two solvent systems (CH<sub>3</sub>CN as organic phase in Method I and CH<sub>3</sub>OH as organic phase in Method II) listed in the table at a flow rate of 1 mL/min.

| Compound  | Method I                                                                                                                                      | Method II                                                                                                                                   |
|-----------|-----------------------------------------------------------------------------------------------------------------------------------------------|---------------------------------------------------------------------------------------------------------------------------------------------|
| <b>7</b>  | CH <sub>3</sub> CN:0.01M (NH <sub>4</sub> ) <sub>2</sub> CO <sub>3</sub> = 50:50 (v/v)<br>retention time: 8.42 min<br>relative purity: 99.8%  | CH <sub>3</sub> OH:0.01M (NH <sub>4</sub> ) <sub>2</sub> CO <sub>3</sub> =60:40 (v/v)<br>retention time: 5.72 min<br>relative purity: 99.9% |
| <b>8</b>  | CH <sub>3</sub> CN:0.01M (NH <sub>4</sub> ) <sub>2</sub> CO <sub>3</sub> = 50:50 (v/v)<br>retention time: 18.11 min<br>relative purity: 97.7% | CH <sub>3</sub> OH:0.01M (NH <sub>4</sub> ) <sub>2</sub> CO <sub>3</sub> =98:2 (v/v)<br>retention time: 3.01 min<br>relative purity: 99.1%  |
| <b>9</b>  | CH <sub>3</sub> CN:0.01M (NH <sub>4</sub> ) <sub>2</sub> CO <sub>3</sub> = 50:50 (v/v)<br>retention time: 22.86 min<br>relative purity: 97.1% | CH <sub>3</sub> OH:0.01M (NH <sub>4</sub> ) <sub>2</sub> CO <sub>3</sub> =98:2 (v/v)<br>retention time: 3.72 min<br>relative purity: 97.3%  |
| <b>10</b> | CH <sub>3</sub> CN:0.01M (NH <sub>4</sub> ) <sub>2</sub> CO <sub>3</sub> = 96:4 (v/v)<br>retention time: 5.15 min<br>relative purity: 99.9%   | CH <sub>3</sub> OH:0.01M (NH <sub>4</sub> ) <sub>2</sub> CO <sub>3</sub> =98:2 (v/v)<br>retention time: 2.34min<br>relative purity: 99%     |
| <b>11</b> | CH <sub>3</sub> CN:0.01M (NH <sub>4</sub> ) <sub>2</sub> CO <sub>3</sub> = 50:50 (v/v)<br>retention time: 21.47 min<br>relative purity: 94.0% | CH <sub>3</sub> OH:0.01M (NH <sub>4</sub> ) <sub>2</sub> CO <sub>3</sub> =98:2 (v/v)<br>retention time: 3.51 min<br>relative purity: 98.1%  |
| <b>12</b> | CH <sub>3</sub> CN:0.01M (NH <sub>4</sub> ) <sub>2</sub> CO <sub>3</sub> = 50:50 (v/v)<br>retention time: 21.80 min<br>relative purity: 97.1% | CH <sub>3</sub> OH:0.01M (NH <sub>4</sub> ) <sub>2</sub> CO <sub>3</sub> =98:2 (v/v)<br>retention time: 3.55 min<br>relative purity: 96.5%  |
| <b>13</b> | CH <sub>3</sub> CN:0.01M (NH <sub>4</sub> ) <sub>2</sub> CO <sub>3</sub> = 50:50 (v/v)<br>retention time: 18.24 min<br>relative purity: 95.4% | CH <sub>3</sub> OH:0.01M (NH <sub>4</sub> ) <sub>2</sub> CO <sub>3</sub> =98:2 (v/v)<br>retention time: 3.42 min<br>relative purity: 95.0%  |
| <b>14</b> | CH <sub>3</sub> CN:0.01M (NH <sub>4</sub> ) <sub>2</sub> CO <sub>3</sub> = 50:50 (v/v)                                                        | CH <sub>3</sub> OH:0.01M (NH <sub>4</sub> ) <sub>2</sub> CO <sub>3</sub> =60:40 (v/v)                                                       |

|  |                                                     |                                                    |
|--|-----------------------------------------------------|----------------------------------------------------|
|  | retention time: 11.48 min<br>relative purity: 95.3% | retention time: 7.08 min<br>relative purity: 96.2% |
|--|-----------------------------------------------------|----------------------------------------------------|

**Table S2.** Information about the 35 crystal structures of *h*DHODH deposited in the Protein Data Bank.

| No.   | PDB ID | No. of buried water molecules in the ubiquinone-binding site | Resolution (Å) |
|-------|--------|--------------------------------------------------------------|----------------|
| 1     | 1D3G   | 1                                                            | 1.6            |
| 2     | 1D3H   | 2                                                            | 1.8            |
| 3     | 2B0M   | 1                                                            | 2.0            |
| 4     | 2BXV   | 1                                                            | 2.15           |
| 5     | 2FPT   | 1                                                            | 2.4            |
| 6     | 2FPV   | 1                                                            | 1.8            |
| 7     | 2FPY   | 1                                                            | 2.0            |
| 8     | 2FQI   | 1                                                            | 1.95           |
| 9     | 2PRH   | 1                                                            | 2.4            |
| 10    | 2PRL   | 1                                                            | 2.1            |
| 11    | 2PRM   | 1                                                            | 3.0            |
| 12    | 2WV8   | 1                                                            | 1.9            |
| 13    | 3F1Q   | 2                                                            | 2              |
| 14    | 3FJ6   | 3                                                            | 1.8            |
| 15    | 3FJL   | 2                                                            | 1.9            |
| 16    | 3G0U   | 2                                                            | 2.0            |
| 17    | 3G0X   | 1                                                            | 1.8            |
| 18    | 3KVJ   | 0                                                            | 1.94           |
| 19    | 3KVK   | 2                                                            | 2.05           |
| 20    | 3KVL   | 1                                                            | 1.85           |
| 21    | 3KVM   | 2                                                            | 2.0            |
| 22    | 3U2O   | 1                                                            | 2.18           |
| 23    | 3ZWS   | 0                                                            | 1.6            |
| 24    | 3ZWT   | 0                                                            | 1.55           |
| 25    | 3W7R   | 0                                                            | 1.68           |
| 26    | 4JTU   | 1                                                            | 1.90           |
| 27    | 4OQV   | 2                                                            | 1.23           |
| 28    | 4IGH   | 1                                                            | 1.3            |
| 29    | 4JGD   | 2                                                            | 2.05           |
| 30    | 4JS3   | 0                                                            | 2.0            |
| 31    | 4JTS   | 0                                                            | 2.21           |
| 32    | 4JTT   | 0                                                            | 2.10           |
| 33    | 4LS0   | 3                                                            | 2.07           |
| 34    | 4LS1   | 3                                                            | 2.20           |
| 35    | 4LS2   | 2                                                            | 2.27           |
| total |        | 43                                                           |                |

## Schemes

### Scheme S1. Synthesis of the benzylidenehydrazinyl-substituted thiazole derivatives

#### 15-18, 20-21<sup>1-3</sup>

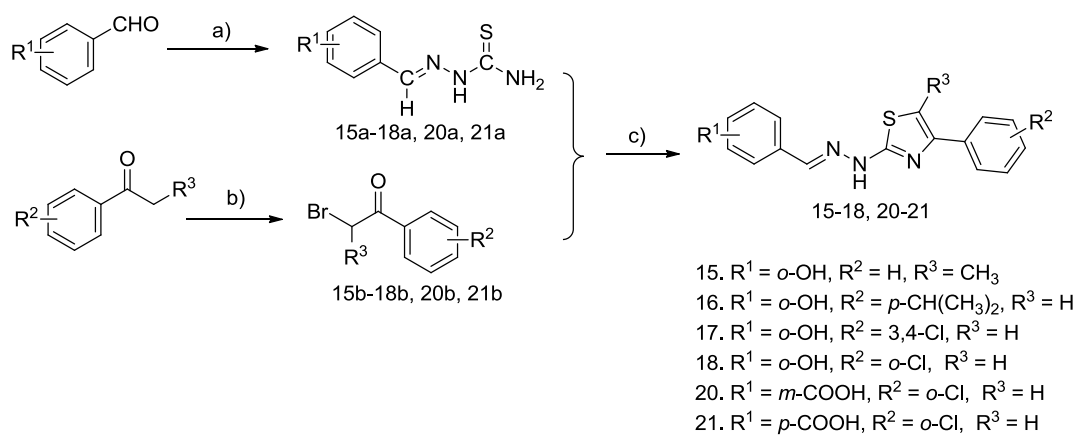

General conditions: a) Thiosemicarbazide, ethanol/acetic acid, 40 °C 4-5 h; b) Br<sub>2</sub>,

AlCl<sub>3</sub>, anhydrous ether, overnight at 0 °C; c) Ethanol, reflux for 3 h.

**Scheme S2.** Synthesis of the benzylidenehydrazinyl-substituted thiazole derivatives **19, 24-32**<sup>1,2,4,5</sup>

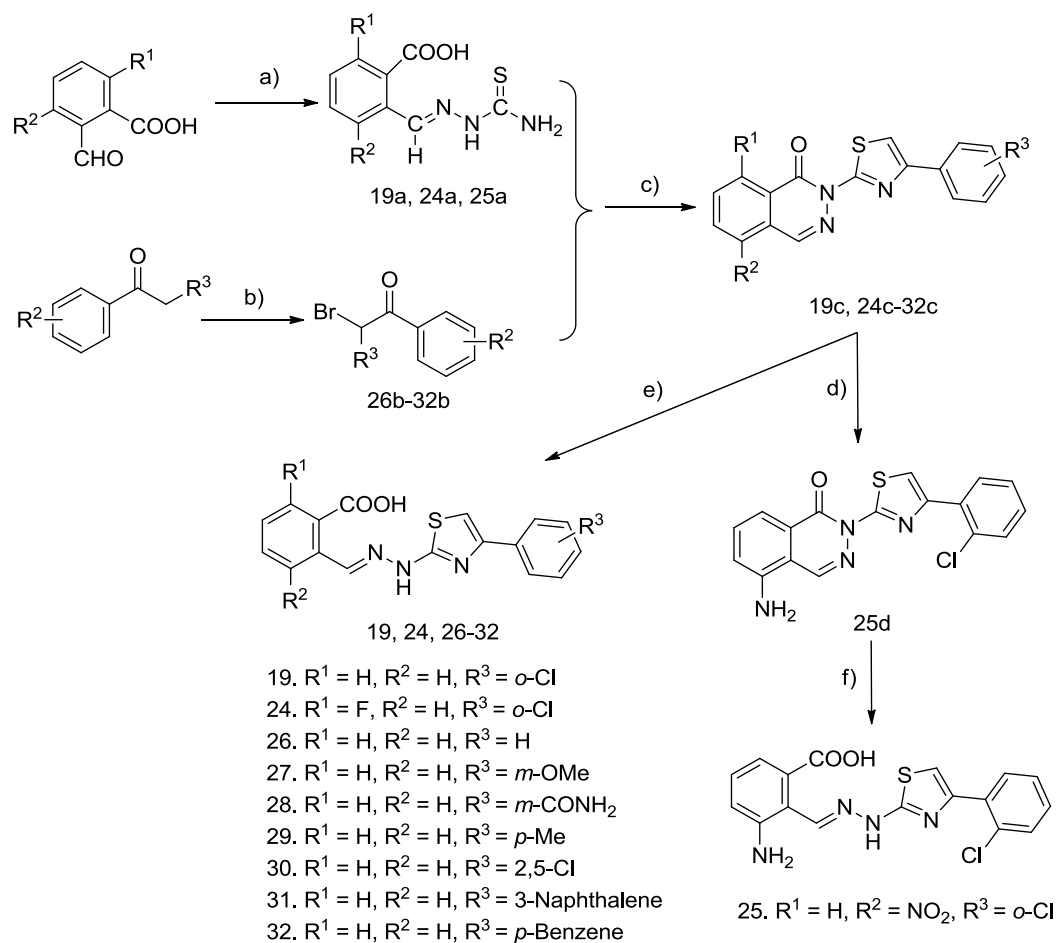

General conditions: a) Thiosemicarbazide, ethanol/acetic acid, 40 °C for 4-5 h; b) Br<sub>2</sub>, AlCl<sub>3</sub>, anhydrous ether, overnight at 0 °C; c) Ethanol, reflux for 3 h; d) SnCl<sub>2</sub>, HCl, 80 °C for 5 h; e) NaOH, dry THF, overnight at rt; f) NaOH, dry THF, overnight at rt;

**Scheme S3.** Synthesis of the o-carboxybenzaldehyde intermediates **24V-25V** <sup>6-12</sup>

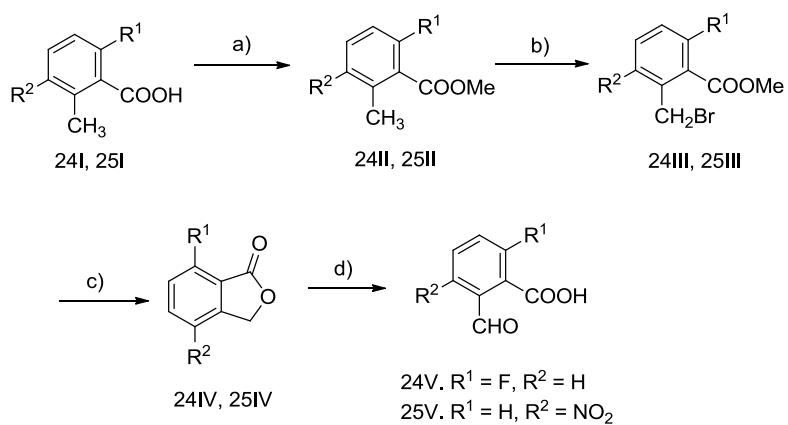

General conditions: a) 98% H<sub>2</sub>SO<sub>4</sub>, methanol, reflux overnight; b) NBS, AIBN, CCl<sub>4</sub>, reflux 4-6 h; c) CaCO<sub>3</sub>, H<sub>2</sub>O/1,4-dioxane (1:1, v/v), 90 °C 5 h; d) 1. NBS, AIBN, ClCH<sub>2</sub>CH<sub>2</sub>Cl, reflux 4 h; 2. H<sub>2</sub>O, reflux 5-6 h.



**Scheme S4.** Synthesis of the benzylidenehydrazinyl-substituted thiazole derivatives **22-23**<sup>2,3,13-15</sup>

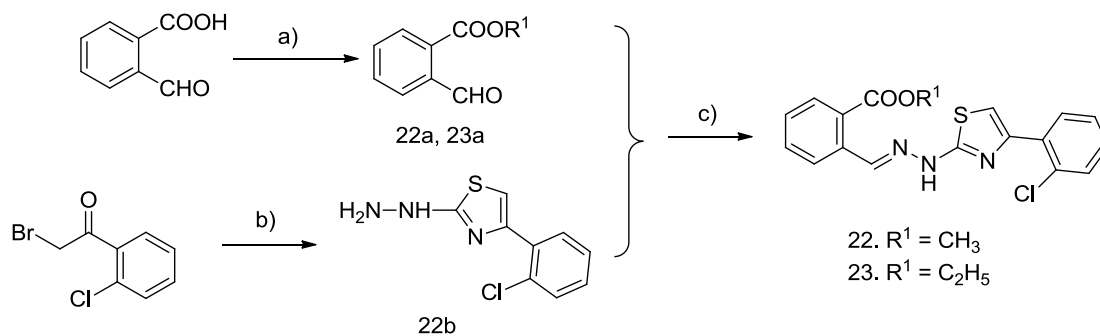

General conditions: a) Iodomethane/Iodoethane, potassium carbonate, dry DMF, reflux for 3 h; b) Thiosemicarbazide, 1,4-dioxane, overnight at rt; c) ethanol/acetic acid, rt for 5 h.

## Reference

1. Bharti, S. K., Nath, G., Tilak, R. & Singh, S. Synthesis, anti-bacterial and anti-fungal activities of some novel Schiff bases containing 2, 4-disubstituted thiazole ring. *Eur. J. Med. Chem.* **45**, 651-660 (2010).
2. Sekimata, K. *et al.* A specific and potent inhibitor of brassinosteroid biosynthesis possessing a dioxolane ring. *J. Agric. Food Chem.* **50**, 3486-3490 (2002).
3. Porcal, W. *et al.* New trypanocidal hybrid compounds from the association of hydrazone moieties and benzofuroxan heterocycle. *Biorg. Med. Chem.* **16**, 6995-7004 (2008).
4. Furuta, T. *et al.* Synthesis of Axially Chiral Amino Acid and Amino Alcohols via Additive- Ligand-Free Pd-Catalyzed Domino Coupling Reaction and Subsequent Transformations of the Product Amidoaza [5] helicene. *J. Org. Chem.* **75**, 7010-7013 (2010).
5. Lipilin, D., Churakov, A., Strelenko, Y. A. & Tartakovsky, V. Selective reduction of the nitro group in the presence of the azoxy group. Synthesis of 2-(alkyl-NNO-azoxy) anilines. *Russ. Chem. Bull.* **51**, 311-318 (2002).
6. Mirabdolbaghi, R. & Dudding, T. An Indium-Mediated Allylative/Transesterification DFT-Directed Approach to Chiral C (3)-Functionalized Phthalides. *Org. Lett.* **14**, 3748-3751 (2012).
7. Koeberle, S. C. *et al.* Design, synthesis, and biological evaluation of novel disubstituted dibenzosuberones as highly potent and selective inhibitors of p38

- mitogen activated protein kinase. *J. Med. Chem.* **55**, 5868-5877 (2012).
8. Zhang, S., Xu, L. & Trudell, M. L. Selective oxidation of benzylic alcohols and TBDMS ethers to carbonyl compounds with CrO<sub>3</sub>-H<sub>5</sub>IO<sub>6</sub>. *Synthesis* **2005**, 1757-1760 (2005).
  9. Silva, N. M., Tributino, J. L., Miranda, A. L., Barreiro, E. J. & Fraga, C. A. New isoxazole derivatives designed as nicotinic acetylcholine receptor ligand candidates. *Eur. J. Med. Chem.* **37**, 163-170 (2002).
  10. Xu, B. *et al.* *O*-Spiro-*C*-aryl glucosides as novel sodium-dependent glucose co-transporter 2 (SGLT2) inhibitors. *Bioorg. Med. Chem. Lett.* **19**, 5632-5635 (2009).
  11. van den Heuvel, M., van den Berg, T. A., Kellogg, R. M., Choma, C. T. & Feringa, B. L. Synthesis of a non-heme template for attaching four peptides: an approach to artificial iron (II)-containing peroxidases. *J. Org. Chem.* **69**, 250-262 (2004).
  12. Liu, C., Lin, J., DeLucca, G. V., Douglas, B. G. & Liu, Q. (Google Patents, 2011).
  13. Kiselev, E., Empey, N., Agama, K., Pommier, Y. & Cushman, M. Dibenzo [c, h][1, 5] naphthyridinediones as topoisomerase I inhibitors: design, synthesis, and biological evaluation. *J. Org. Chem.* **77**, 5167-5172 (2012).
  14. Lata, D. *et al.* Thiosemicarbazone platinacycles with tertiary phosphines. Preparation of novel heterodinuclear platinum–tungsten complexes. *Polyhedron* **41**, 30-39 (2012).

15. London, I. M. *et al.* Regulation of protein synthesis. *The enzymes* **18**, 359-380 (1987).
